# Supplementary material for: Synthesis of bottlebrush polymers based on poly(N-sulfonyl aziridine) macromonomers
Source: Royal Society of Chemistry journal article supplement (doi:10.1039/d2py01125e), 2022-01-01

## Supporting Information

### Synthesis of Bottlebrush Polymers Based on Poly(*N*-Sulfonyl Aziridine) Macromonomers

William R. Archer, Grace E. Dinges, Piper L. MacNicol, and Michael D. Schulz\*

Department of Chemistry, Macromolecules Innovation Institute (MII)  
Virginia Tech, Blacksburg, VA 24061

Correspondence: Dr. Michael D. Schulz, [mdschulz@vt.edu](mailto:mdschulz@vt.edu)

(GED and PLM contributed equally to this work)

#### Table of Contents

|                                                                                                                  |           |
|------------------------------------------------------------------------------------------------------------------|-----------|
| <b>Fig. S1:</b> <sup>1</sup> H NMR of ditosylated product.                                                       | <b>S2</b> |
| <b>Fig. S2:</b> <sup>13</sup> C NMR of ditosylated product.                                                      | <b>S2</b> |
| <b>Fig. S3:</b> <sup>1</sup> H NMR of 2-methyltosylaziridine monomer.                                            | <b>S3</b> |
| <b>Fig. S4:</b> <sup>13</sup> C NMR of 2-methyltosylaziridine monomer.                                           | <b>S3</b> |
| <b>Fig. S5:</b> <sup>1</sup> H NMR of Boc-norbornene imide.                                                      | <b>S4</b> |
| <b>Fig. S6:</b> <sup>1</sup> H NMR of norbornene aza-anionic initiator.                                          | <b>S5</b> |
| <b>Fig. S7:</b> <sup>13</sup> C NMR of norbornene aza-anionic initiator.                                         | <b>S5</b> |
| <b>Fig. S8:</b> <sup>1</sup> H NMR of poly(2-methyltosylaziridine) macromonomer.                                 | <b>S6</b> |
| <b>Fig. S9:</b> SEC Trace of poly(2-methyltosylaziridine) macromonomer.                                          | <b>S6</b> |
| <b>Fig. S10:</b> Kinetics plot of grafting-through bottlebrush synthesis.                                        | <b>S7</b> |
| <b>Fig. S11:</b> Representative <sup>1</sup> H NMR of bottlebrush poly(norbornene-graft-2-methyltosylaziridine). | <b>S7</b> |
| <b>Fig. S12:</b> Raw DLS correlation coefficients.                                                               | <b>S8</b> |

Fig. S1:  $^1\text{H}$  NMR of ditosylated product in  $\text{CDCl}_3$ .

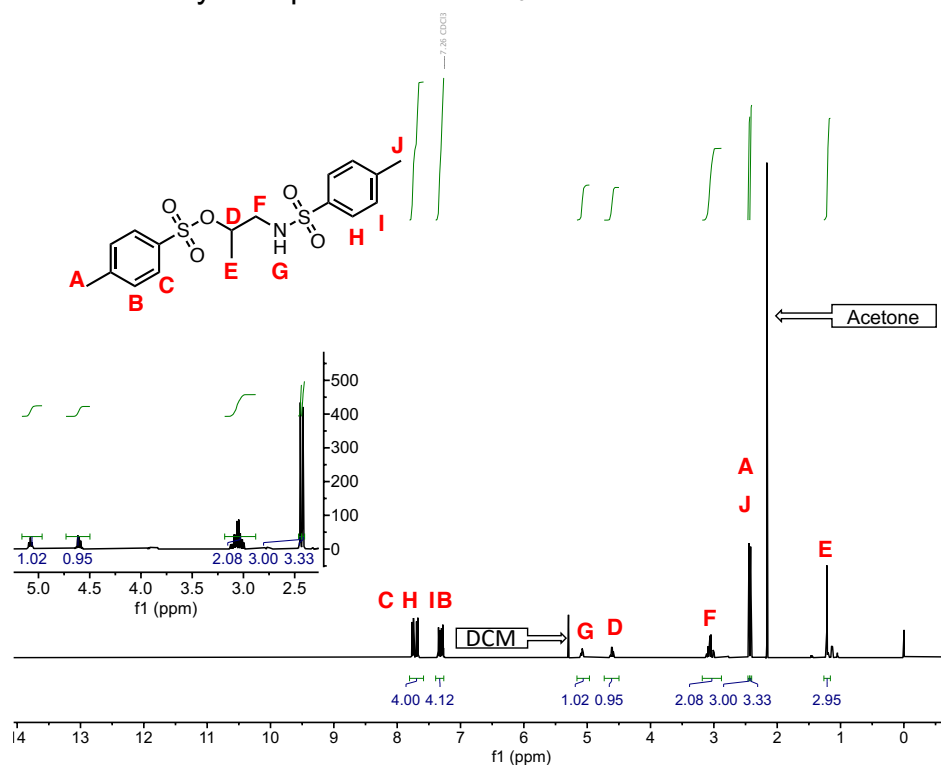

Fig. S2:  $^{13}\text{C}$  NMR of ditosylated product in  $\text{CDCl}_3$ .

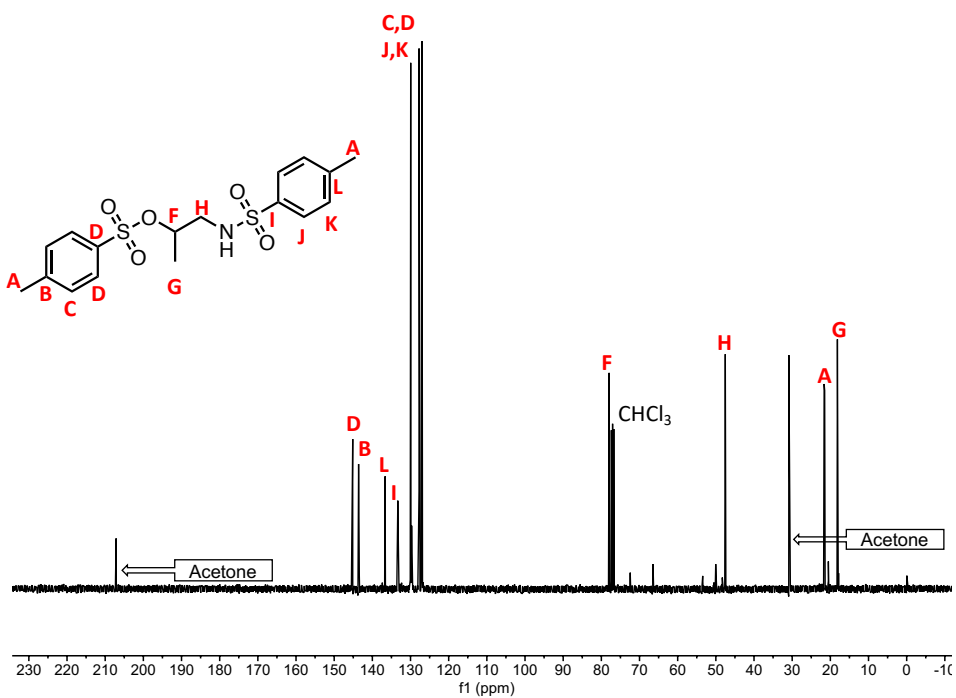

Fig. S3:  $^1\text{H}$  NMR of 2-methyltosylaziridine monomer in  $\text{CDCl}_3$ .

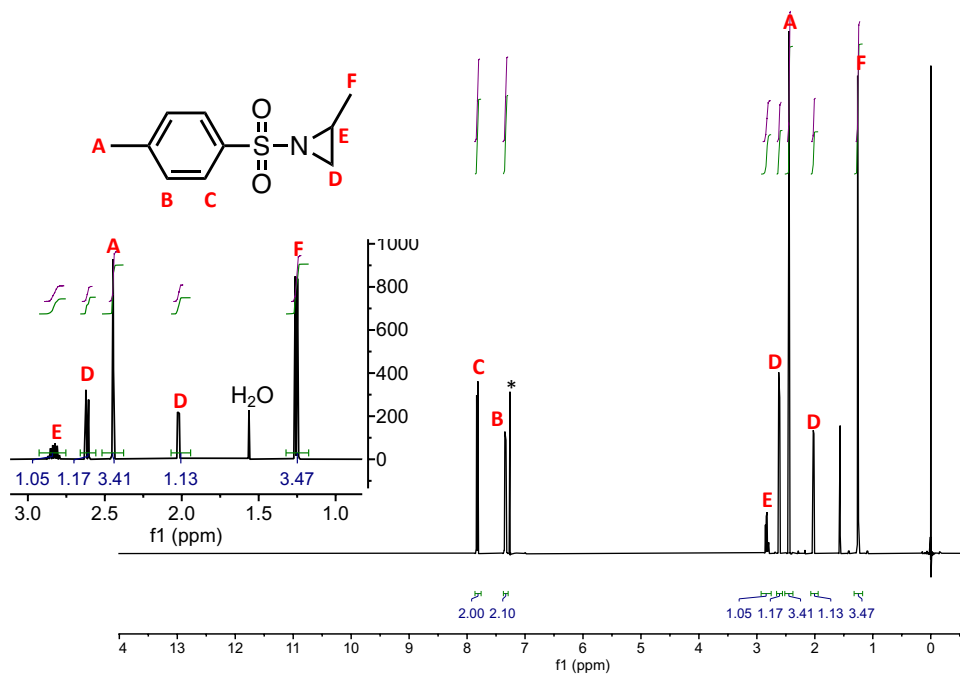

Fig. S4:  $^{13}\text{C}$  NMR of 2-methyltosylaziridine monomer in  $\text{CDCl}_3$ .

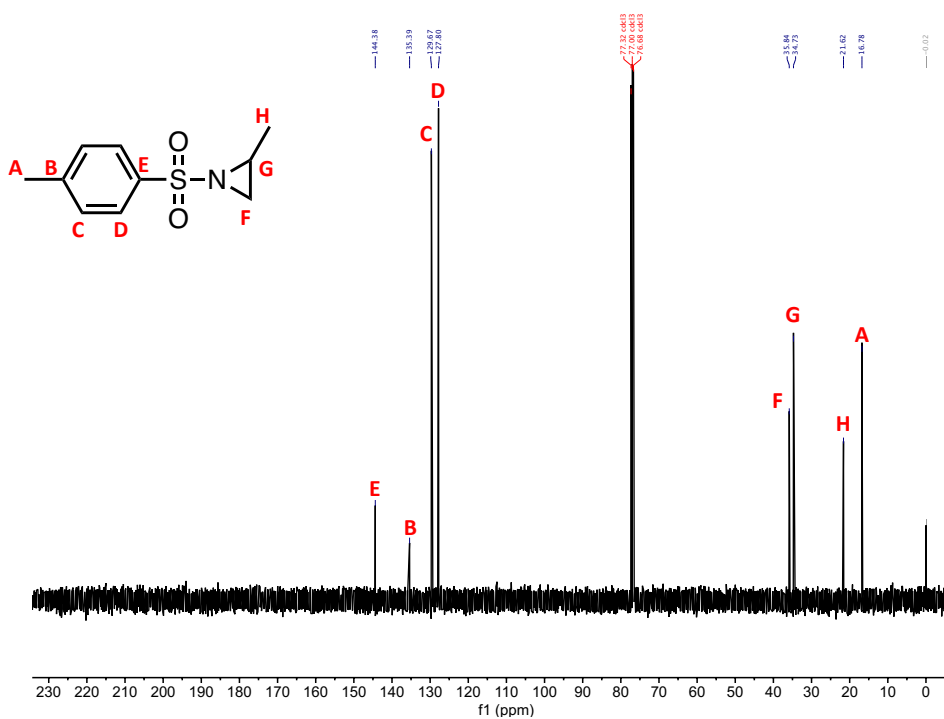

Fig. S5:  $^1\text{H}$  NMR of Boc-norbornene imide in  $\text{CDCl}_3$ .

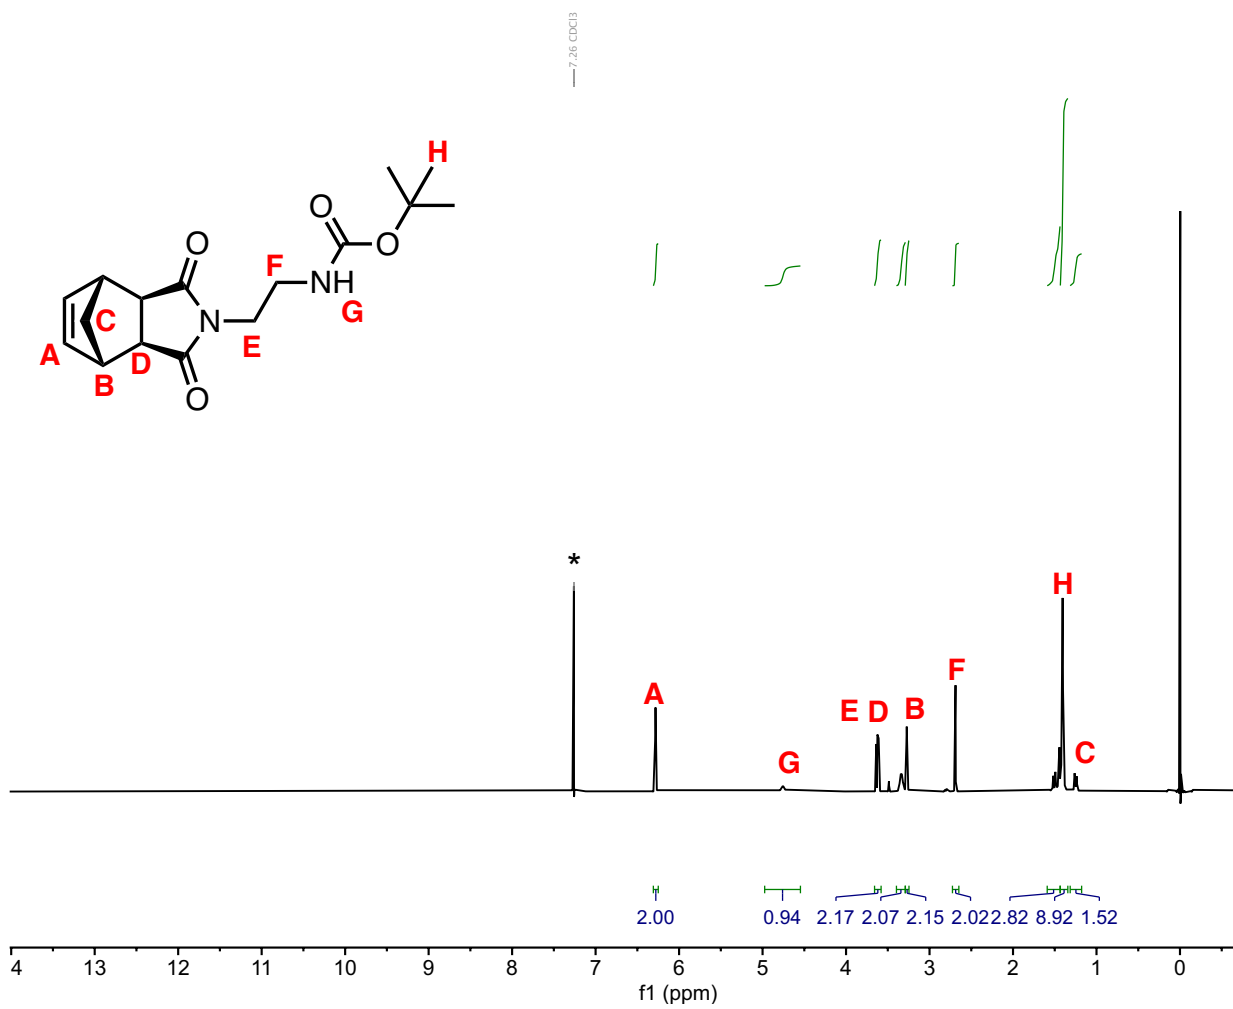

Fig. S6:  $^1\text{H}$  NMR of Norbornene Aza-anionic initiator in  $\text{CDCl}_3$ .

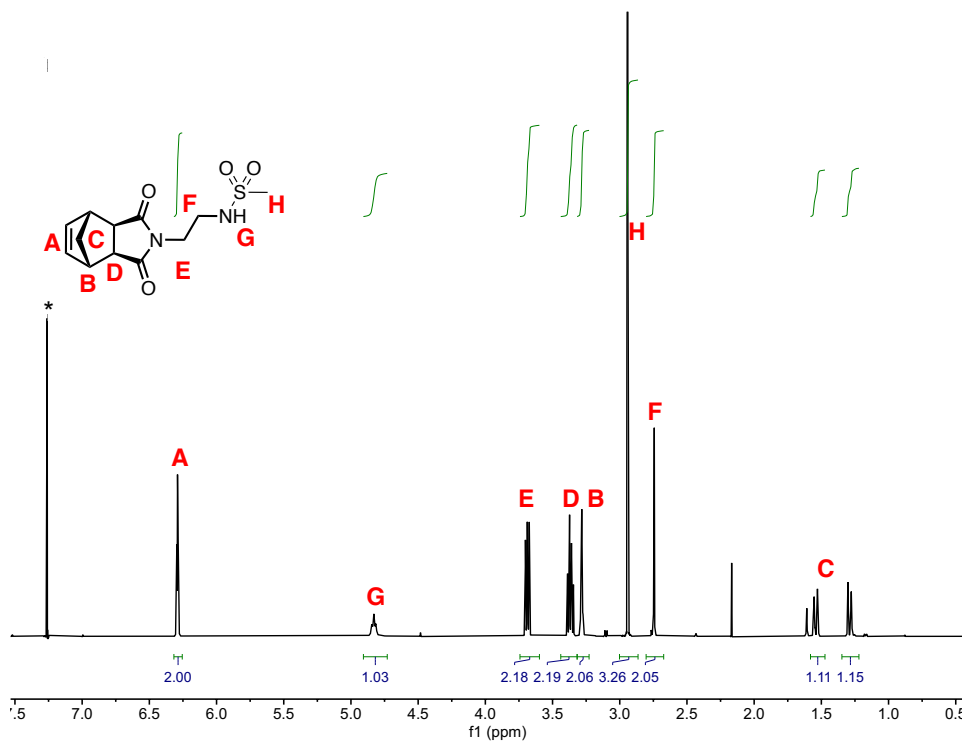

Fig. S7:  $^{13}\text{C}$  NMR of Norbornene Aza-anionic initiator in  $\text{CDCl}_3$ .

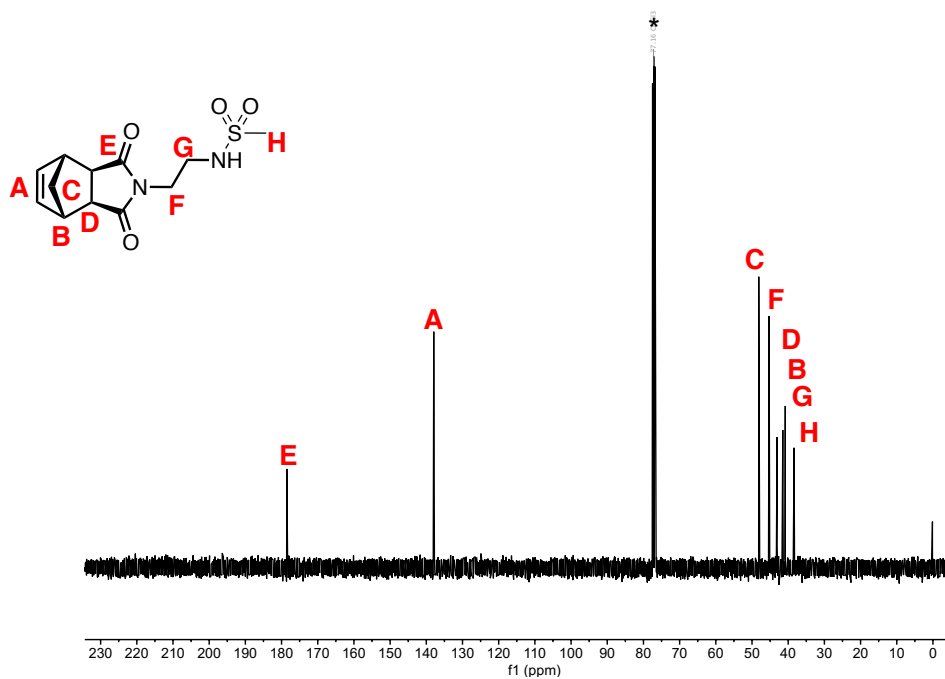

**Fig. S8:**  $^1\text{H}$  NMR of Poly(2-methyltosylaziridine) macromonomer in DMSO-d<sub>6</sub>.

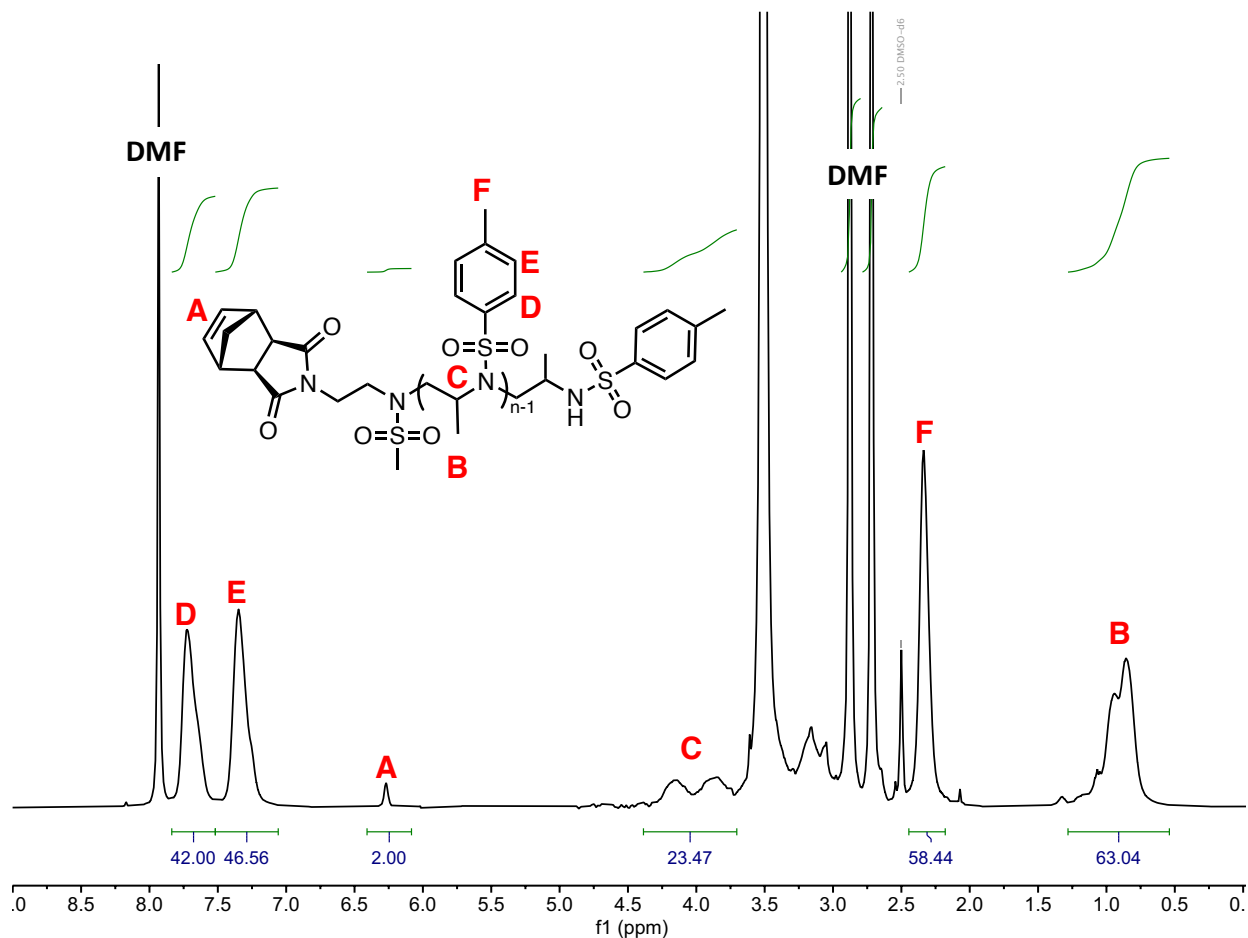

**Fig. S9:** SEC trace of poly(2-methyltosylaziridine) macromonomer.

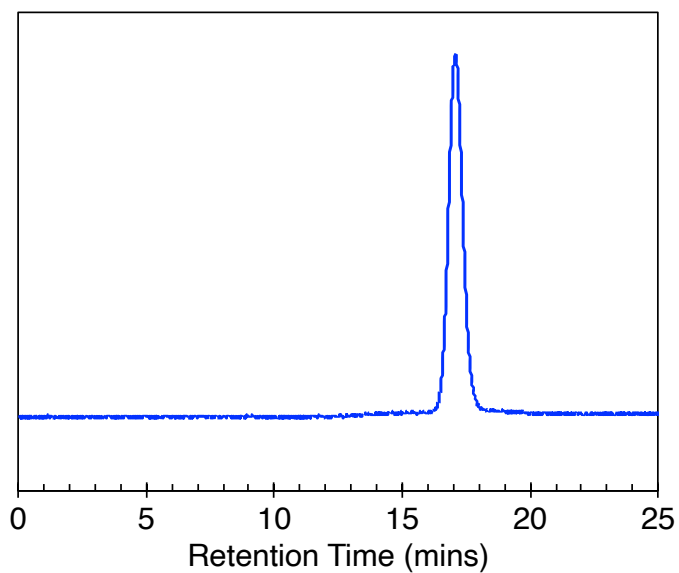

**Fig. S10:** Kinetics plot of grafting-through bottlebrush synthesis.

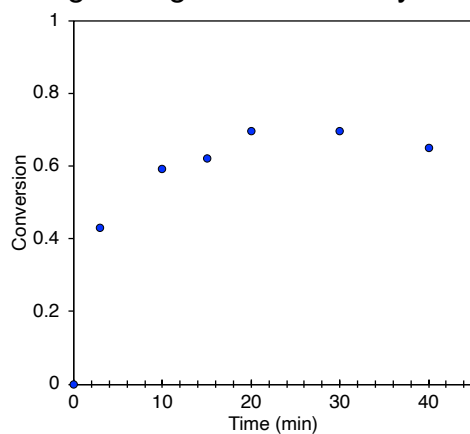

**Fig. S11:** Representative  $^1\text{H}$  NMR of Bottlebrush Poly(norbornene-graft-2-methyltosylaziridine) in dichloromethane- $d_2$ .

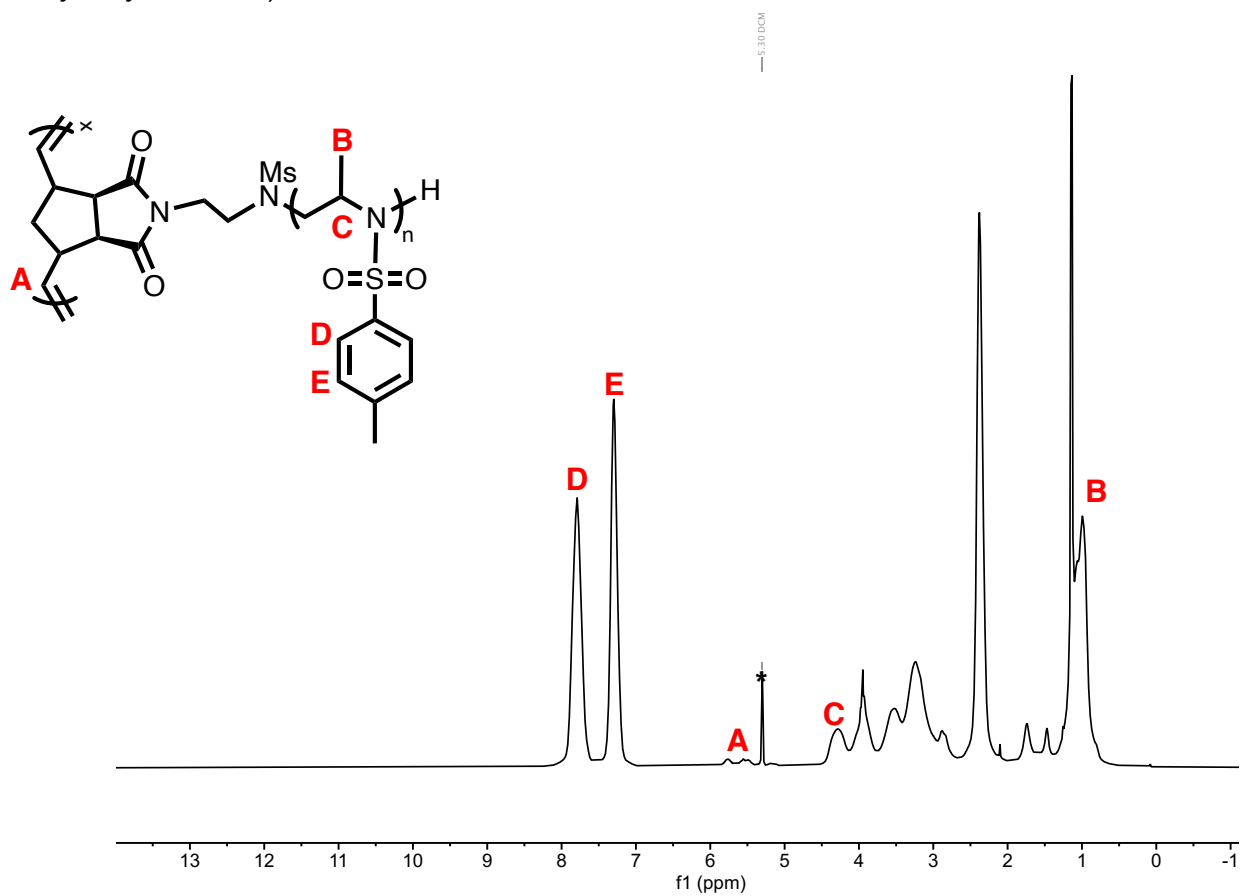

**Fig. S12:** Raw DLS correlation coefficients.

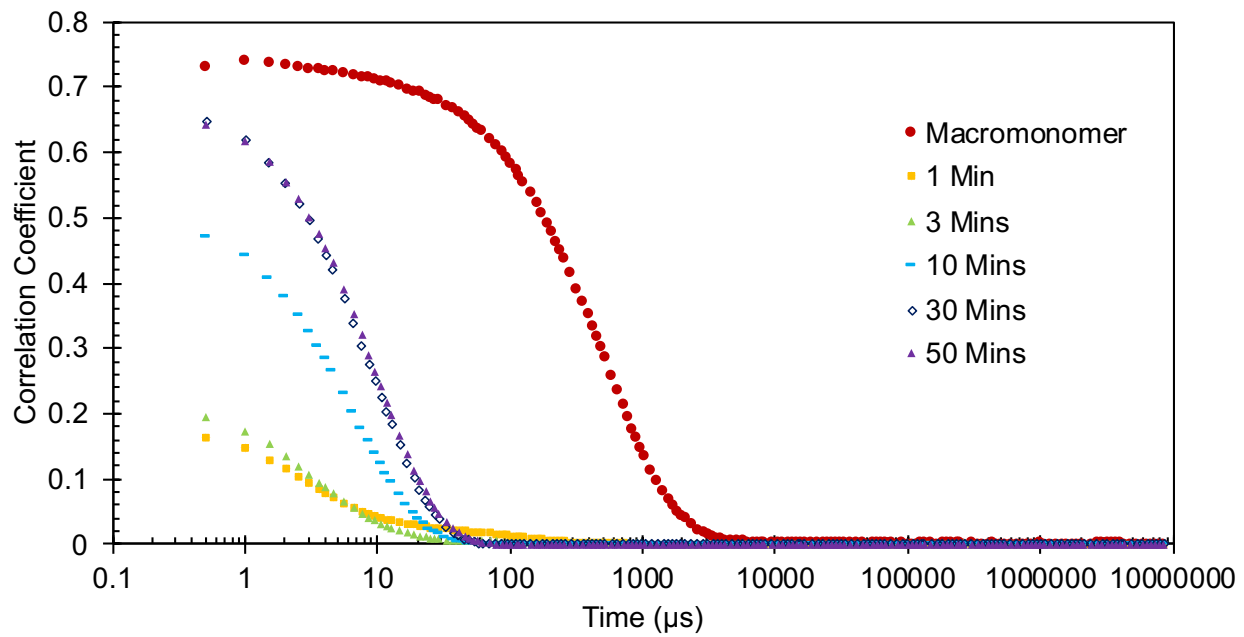

Supplement: d2py01125e1.pdf [file d2py01125e1.pdf]
